# Supplementary material
Source: PubMed Central journal article supplement (PMC11250907)
Supplement: NIHMS1994518-supplement-1.pdf [file NIHMS1994518-supplement-1.pdf]

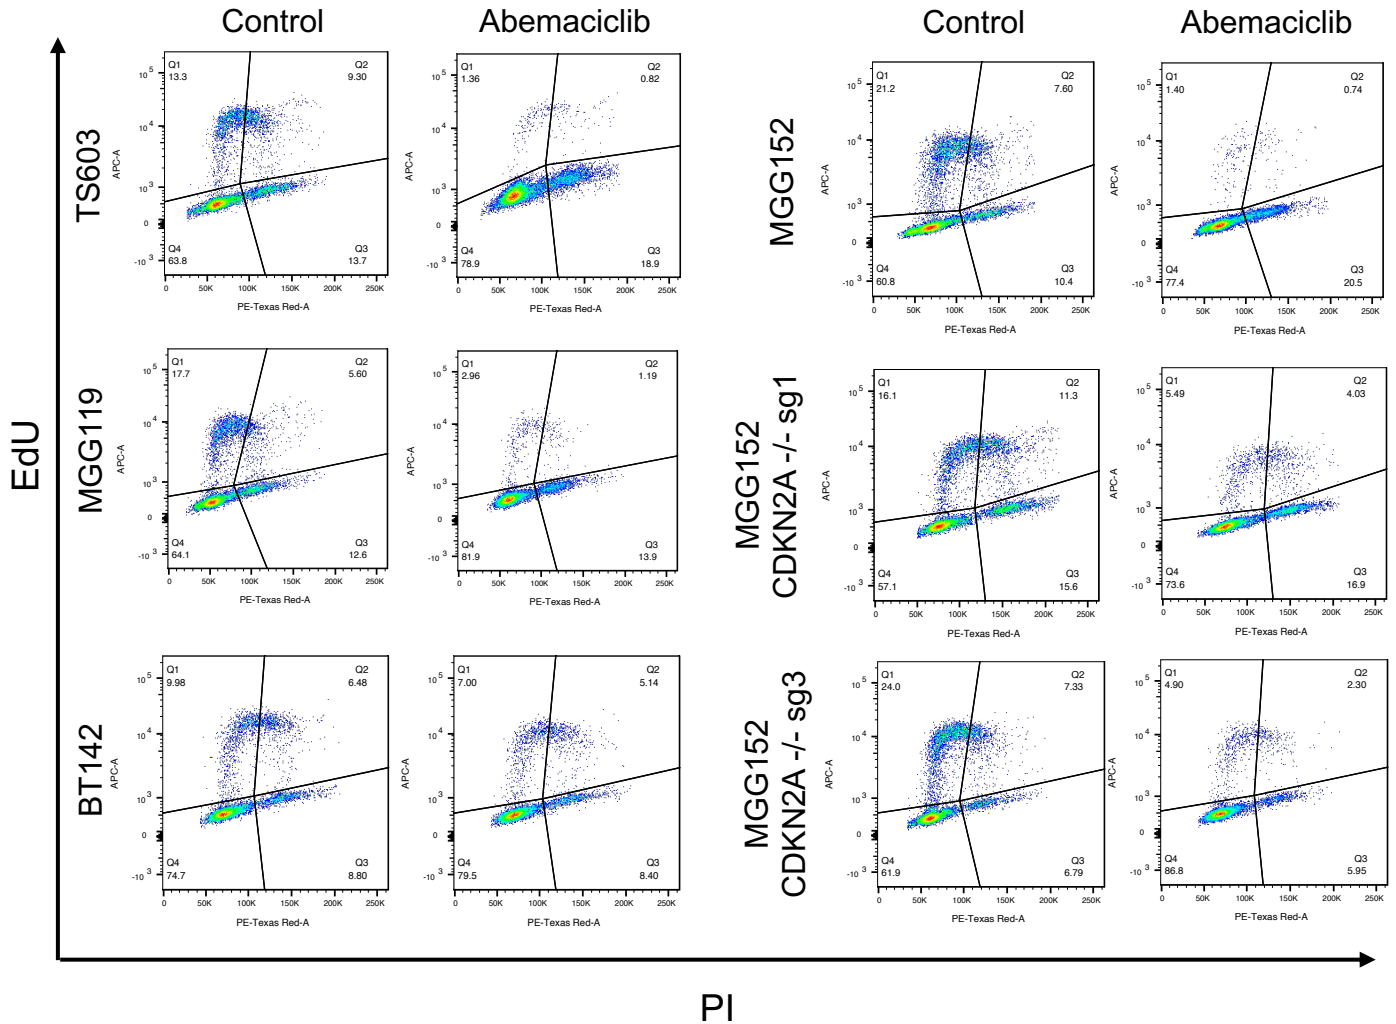

Supplemental Figure 1: Representative raw flow cytometry profiles for each cell line used for creating summary data in Figure 3A. The x-axis shows propidium iodide (PI) staining and the y-axis shows EdU incorporation.
