# Supplementary material
Source: PubMed Central journal article supplement (PMC11250907)
Supplement: NIHMS1994518-supplement-2.pdf [file NIHMS1994518-supplement-2.pdf]

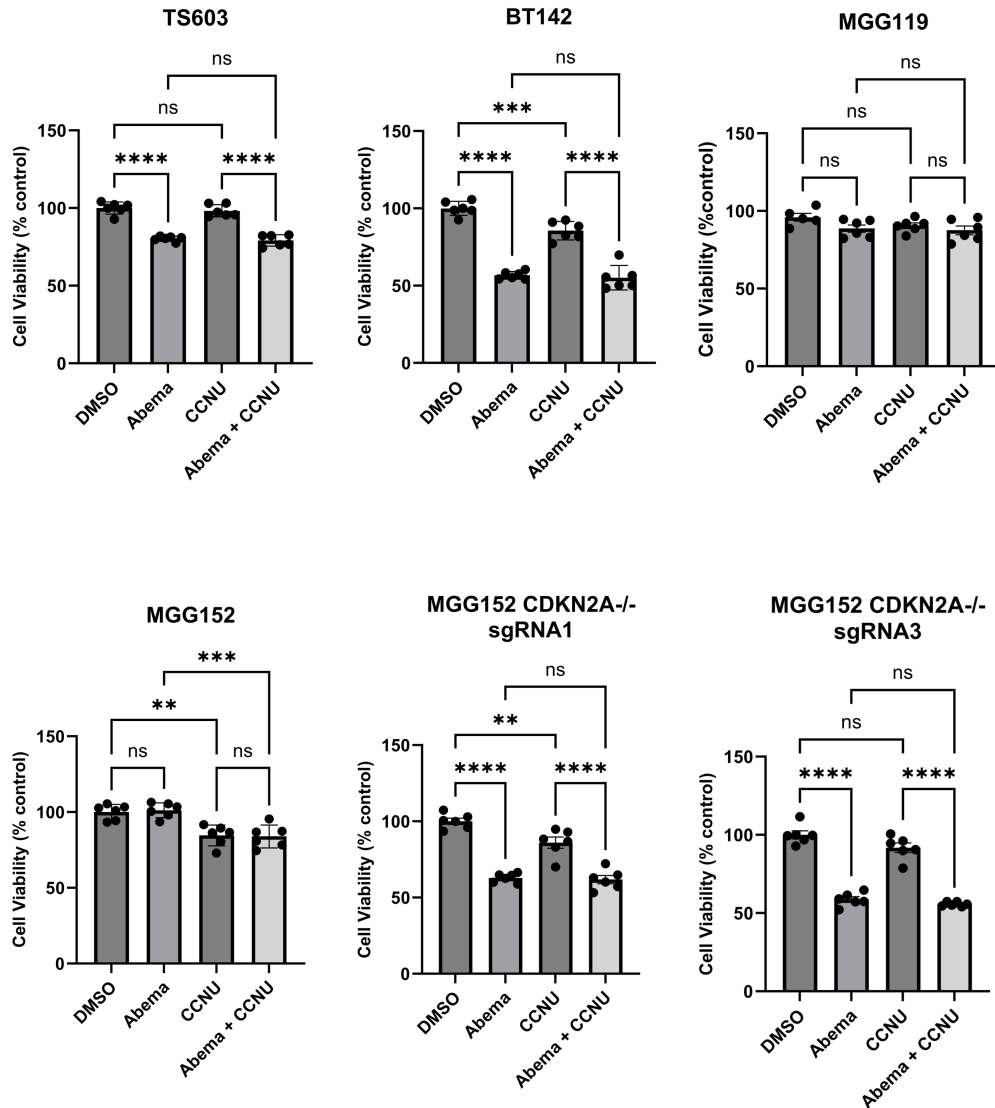

Supplemental Figure 2: Combination treatment with lomustine does not lead to an added benefit. Relative cell viability of IDH-mutant glioma lines treated with DMSO, abemaciclib 0.1  $\mu$ M, lomustine (CCNU) 25  $\mu$ M or combination of abemaciclib plus CCNU for 5 days.  $n = 6$  for each treatment, mean values  $\pm$  SEM. Comparisons were made using one-way ANOVA adjusted for multiple comparisons. ns, non-significant. \*\*,  $p < 0.01$ . \*\*\*,  $p < 0.001$ . \*\*\*\*,  $p < 0.0001$ .
