# Supplementary material
Source: PubMed Central journal article supplement (PMC11250907)
Supplement: NIHMS1994518-supplement-3.pdf [file NIHMS1994518-supplement-3.pdf]

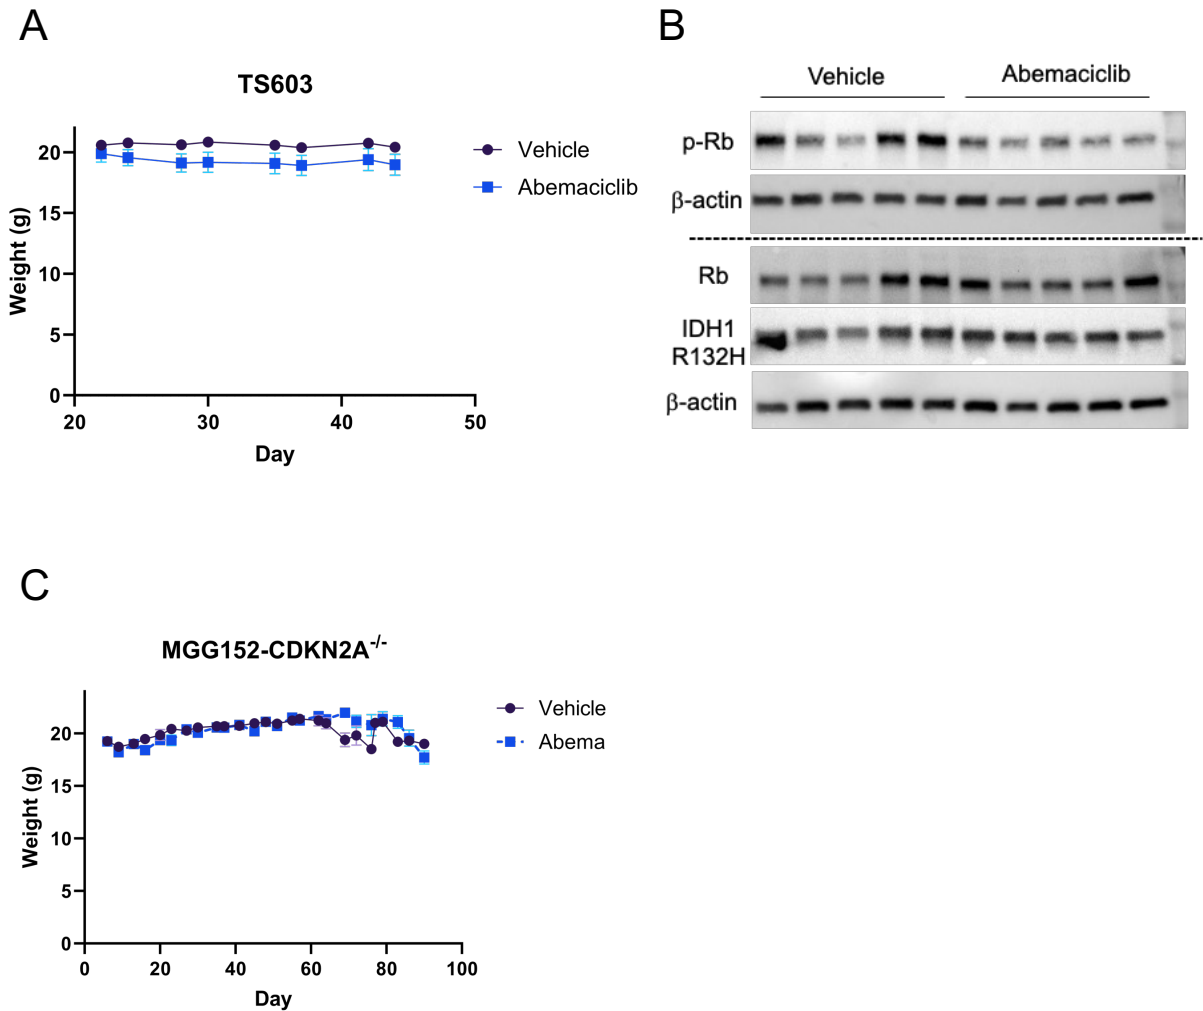

Supplemental Figure 3: Continuous abemaciclib treatment is tolerated appropriately. A. Body weight (grams) of animals with flank TS603 xenograft tumors treated with vehicle or abemaciclib at a dose of 75 mg/kg/day, 5 days a week. B. Immunoblot of tumors from to examine phospho-Rb (p-Rb), total Rb, and IDH1 R132H. Beta-actin serves as a loading control. Dashed line demarcates separate blots performed on the same samples. C. Body weight of animals with orthotopically implanted MGG152-CDKN2A<sup>-/-</sup> xenograft tumors treated with vehicle or abemaciclib at a dose of 90 mg/kg/day, 5 days a week.
